# Supplementary material
Source: bioRxiv or medRxiv preprint supplement (https://www.biorxiv.org/highwire/filestream/78126/field_highwire_adjunct_files/0/254672-1.pdf)
Supplement: Supplementary file [file 254672-1.pdf]

1 **Supplementary Figures and Tables**

2

3 **Inter- and intra-domain functional redundancy in the rumen microbiome**

4 **during plant biomass degradation**

5 Andrea Söllinger<sup>1,2</sup>, Alexander Tøsdal Tveit<sup>3</sup>, Morten Poulsen<sup>4</sup>, Samantha Joan Noel<sup>4</sup>, Mia Bengtsson<sup>2</sup>,

6 Jörg Bernhardt<sup>2</sup>, Anne Louise Frydendahl Hellwing<sup>4</sup>, Peter Lund<sup>4</sup>, Katharina Riedel<sup>2</sup>, Christa Schleper<sup>1</sup>,

7 Ole Højberg<sup>4</sup>, Tim Urich<sup>2\*</sup>

8

9 <sup>1</sup> Department of Ecogenomics and Systems Biology, University of Vienna, Althanstraße 14, 1090 Vienna, Austria

10 <sup>2</sup> Institute of Microbiology, University of Greifswald, Felix-Hausdorff-Straße 8, 17487 Greifswald, Germany

11 <sup>3</sup> Department of Arctic and Marine Biology, UiT, The Arctic University of Norway, Hansine Hansens veg 18, 9019

12 Tromsø, Norway

13 <sup>4</sup> Department of Animal Science, Aarhus University, Blichers Alle 20, 8830 Tjele, Denmark

14

15 \*corresponding author, Institute of Microbiology, Felix-Hausdorff-Straße 8, 17487 Greifswald, Germany; Tel.:

16 +49 (0)3834 420 5904; E-Mail: tim.urich@uni-greifswald.de

17

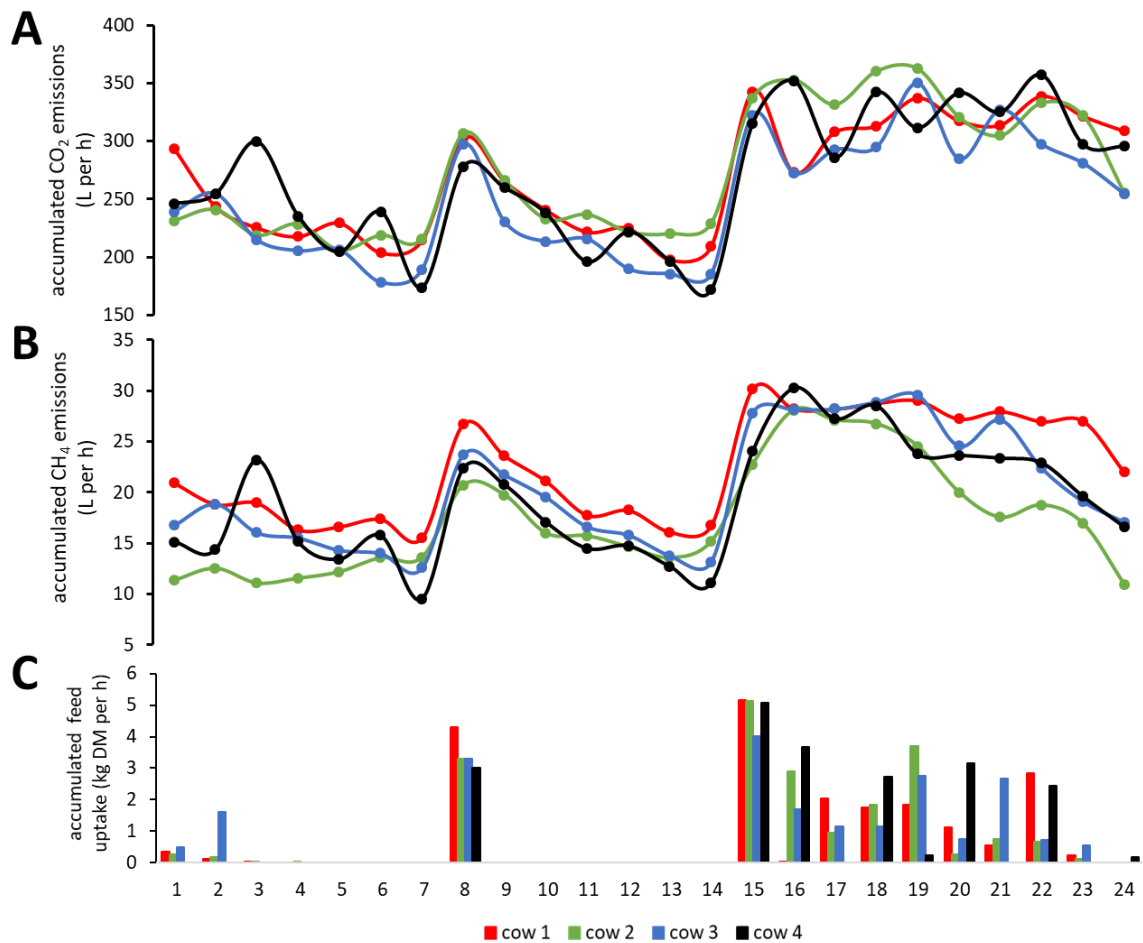

18

19 **Supplementary Figure S1. Diurnal greenhouse gas emissions and feed intake of four lactating**

20 **Holstein cows.** The x-axis is indicating the time, 24 hours are shown (1 am to 12 pm). A and B show the  
 21 accumulated CO<sub>2</sub> and CH<sub>4</sub> emissions over 24 hours, respectively. C shows the feed intake of the cows  
 22 during gas emission measurements (day 4). The cows were fed in a semi-restrictive way, no feed was  
 23 available from 4 am until the morning feeding (7 am to 8 am) and between 8 am and 2 pm. Between 2  
 24 pm and 4 am the cows were allowed to feed ad libitum. In the afternoon CH<sub>4</sub> and CO<sub>2</sub> emissions during  
 25 the first hour of feeding increased similar to after the morning feeding. However, as cows were fed ad  
 26 libitum and took up feed continuously, gas emissions stayed on high levels for several hours and  
 27 eventually dropped at night.

28

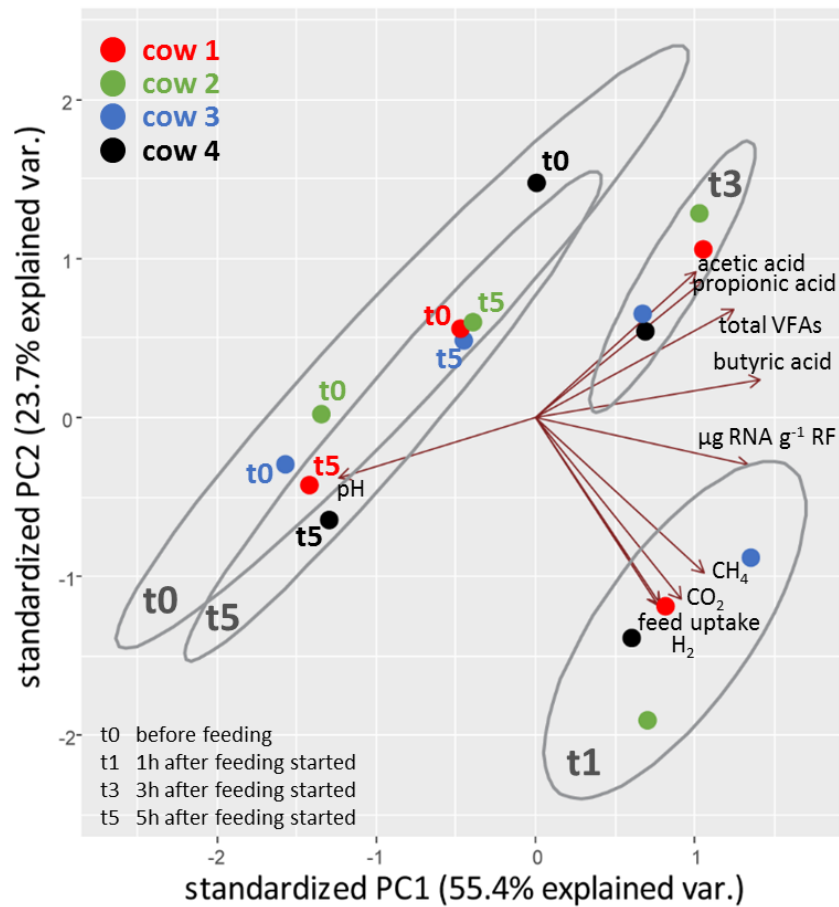

30

31 **Supplementary Figure S2. Biplot showing principal component analysis (PCA) results on rumen fluid**32 **metadata.** The metadata (i.e. gas emissions (CH<sub>4</sub>, CO<sub>2</sub>, H<sub>2</sub>), feed and water intake, pH, volatile fatty

33 acid (VFA) concentrations and total RNA content) obtained from the rumen fluid samples used for

34 metatranscriptomics (t0, t1, t3, t5) were subject to PCA using R (prcomp, ggbiplot). VFAs not detected

35 in the majority of the samples were excluded from the principal components analysis. Prior to the

36 principal component analysis the dimensionally heterogeneous variables were standardised by

37 applying z-scoring for each cow individually. The distance between the samples and their clustering

38 indicates the differences in sample metadata (x axis: first dimension explaining 55.4 % of the variance;

39 y axis: second dimension explaining 23.7 % of variance; ellipses: normal data ellipse for each group

40 (time) with 95% probability). The length of the variable vectors (arrows) is equivalent to the

41 contribution of particular metadata to the ordination. The contribution of a particular variable to PC1

42 and PC2 is given by projecting the arrow-tip of the vector onto PC1 and PC2. The direction of the

43 variable vectors is indicating the sample orientation of its weight (e.g. gas emissions are highest at t1,

44 one hour after the feeding started). Variables with minor contribution to the ordination as well as low

45 abundant VFAs are not shown. Colour code indicates the four different cows; RF, rumen fluid.

46

47

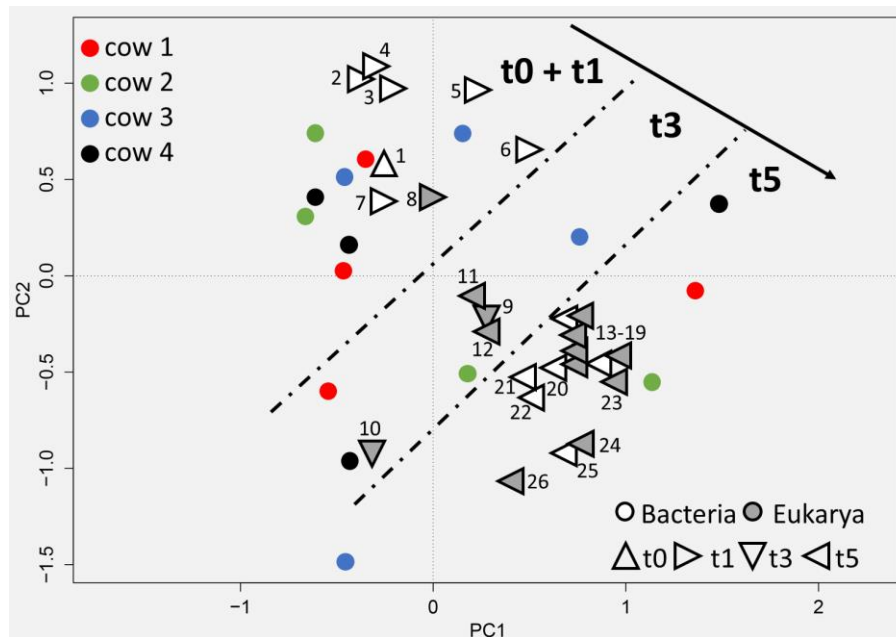

48

49 **Supplementary Figure S3. Biplot showing temporal separation and succession of rumen microbiomes**

50 **during plant biomass degradation.** Rumen fluid microbial communities were subject to various  
 51 analyses using R (i.e. principal component analysis (PCA, function: rda), indicator species analysis  
 52 (function: signassoc), non-metric multidimensional scaling (NMDS, function: metaMDS), PERMANOVA  
 53 (permutational multivariate analysis of variance using distance matrices, function: adonis), differential  
 54 gene expression analysis (function: glmFit). PCA result is shown above. NMDS on a Bray-Curtis  
 55 dissimilarity matrix (function: vegdist) led to a similar time wise separation but less pronounced. For  
 56 both, the PCA and the NMDS, the taxon count matrices were normalized to the library sizes and  
 57 transformed using cow separated z-scoring. Triangles indicate taxa identified by indicator species  
 58 analysis to be significantly higher abundant at a certain time (species scores were plotted onto the PCA  
 59 biplot). Before feeding (t0), one, three, five hours after feeding started (t1, t3, t5), *Succinivibrionaceae*  
 60 (1), *Bacteroidaceae* (2), *Synergistaceae* (3), *Lactobacillaceae* (4), *Burkholderiales* (5), unassigned  
 61 Bacteria (6), *Pseudomonadales* (7), *Ascomycota* (8), *Rhizobiales* (9), *Eremoplastron* (10),  
 62 *Neocallimastigaceae* (11), unassigned *Fungi* (12), unassigned *Tubulinea* (13), *Rhizobiales* (14),  
 63 *Chytridiomycota* (15), *Eccrinales* (16), *Viridiplantae* (17), *Victivallaceae* (18), *Mastigamoeba* (19),  
 64 *Anaeroplasmataceae* (20), Candidate division TM6 (21), RFP12 gut group (22), unassigned *Amoebozoa*  
 65 (23), unassigned *Spirotrichea* (24), *Rhodospirillaceae* (25), *Trichomonadidae* (26). Additionally, relative  
 66 abundance of three eukaryotic taxa (i.e. *Epidinium*, *Eudiplodinium* and unassigned *Litostomata*) were  
 67 identified by differential gene expression analysis to be significantly decreasing from t3 to t5. Besides  
 68 these three taxa no other taxa significantly different over time could be detected via differential gene  
 69 expression analysis.

70

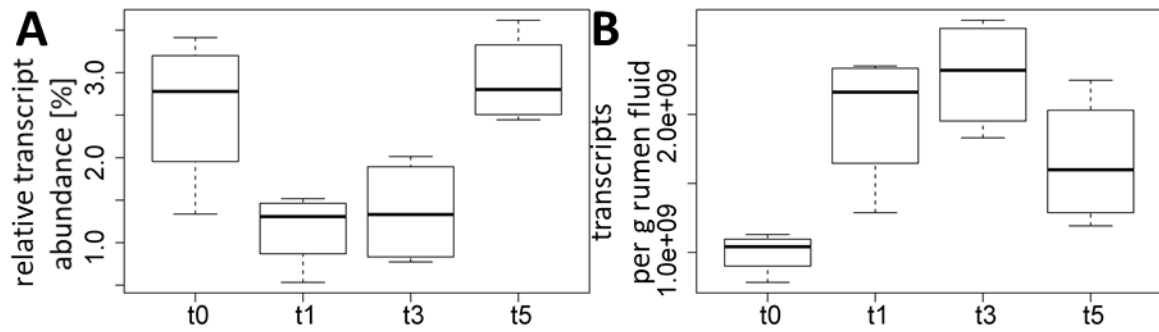

71

72 **Supplementary Figure S4. DNA Replication - comparison of relative and quantified transcript**  
 73 **abundance.** Relative (A) and quantified (B) transcript abundance of reads assigned to the level two  
 74 SEED subsystem DNA Replication. For details on the quantification see Methods section and equation  
 75 1; x-axis: before feeding (t0), one, three, five hours after feeding started (t1, t3, t5). Quantified  
 76 transcripts followed the observed dynamics in total nucleic acid content extracted per g rumen fluid  
 77 (average nucleic acid concentrations [ $\mu\text{g g}^{-1}$  rumen fluid]: 64.7 (t0), 99.0 (t1), 107.8 (t3), 58.0 (t5)).

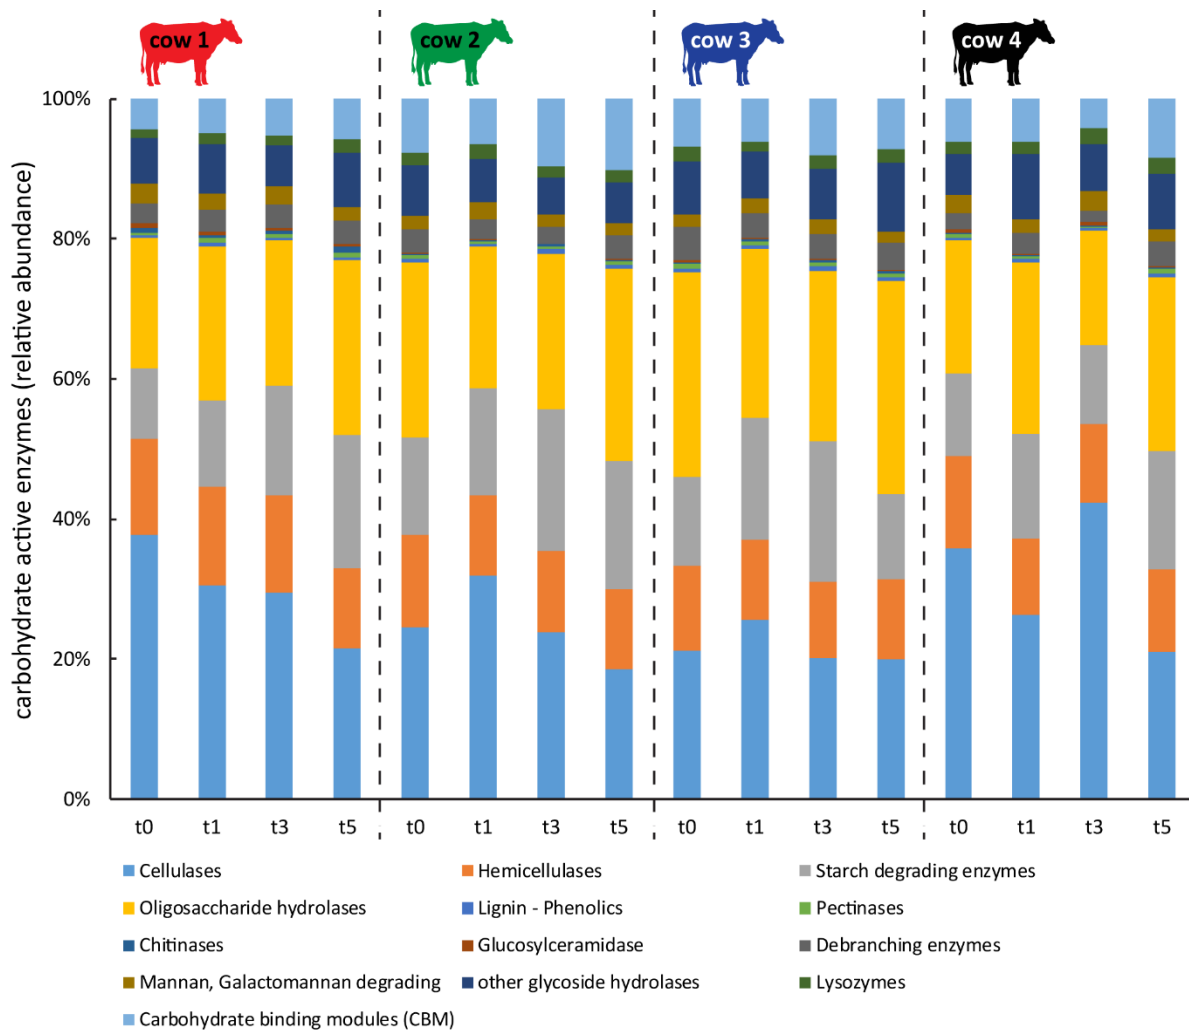

78

79 **Supplementary Figure S5. Relative abundance of carbohydrate active enzymes (CAZymes) present in**  
 80 **the cow rumen metatranscriptomes.** CAZymes were summarized according to their substrate  
 81 specificity/activity (see Supplementary Table S6 for details on the underlying pfam models). X-axis:  
 82 before feeding (t0), one, three, five hours after feeding started (t1, t3, t5).

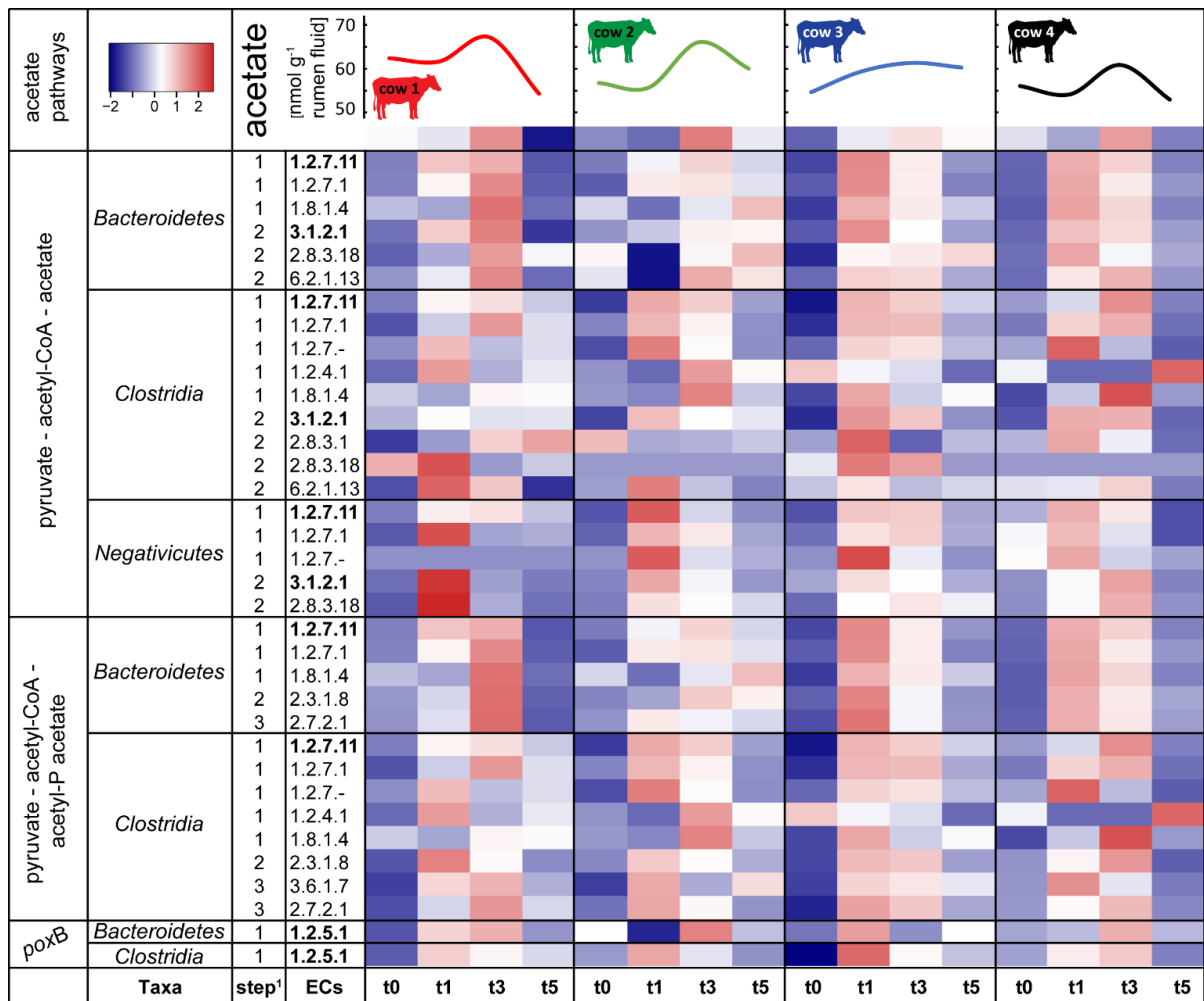

83

84 **Supplementary Figure S6. Dynamics and distribution of transcripts involved in acetate production in**

85 **the rumen.** Heatmap depicting the dynamics of quantified transcripts (encoded by their EC numbers)

86 involved in acetate production (turnover) from pyruvate via acetyl-CoA, acetyl-CoA and acetyl-P and

87 direct production from pyruvate via *poxB* (pyruvate:ubiquinone oxidoreductase) by the rumen

88 microbiome separated for the individual cows. ECs in bold indicate production specific transcripts. The

89 first row of the heatmap depicts the acetate concentrations measured before feeding (t0) and one (t1),

90 three (t3) and five (t5) hours after the feeding started. Additionally, the acetate concentrations (nmol

91 g<sup>-1</sup> rumen fluid) for each cow are depicted above the heatmap. <sup>1</sup>Numbers indicate in which step of the

92 pathway the respective enzymes are involved.

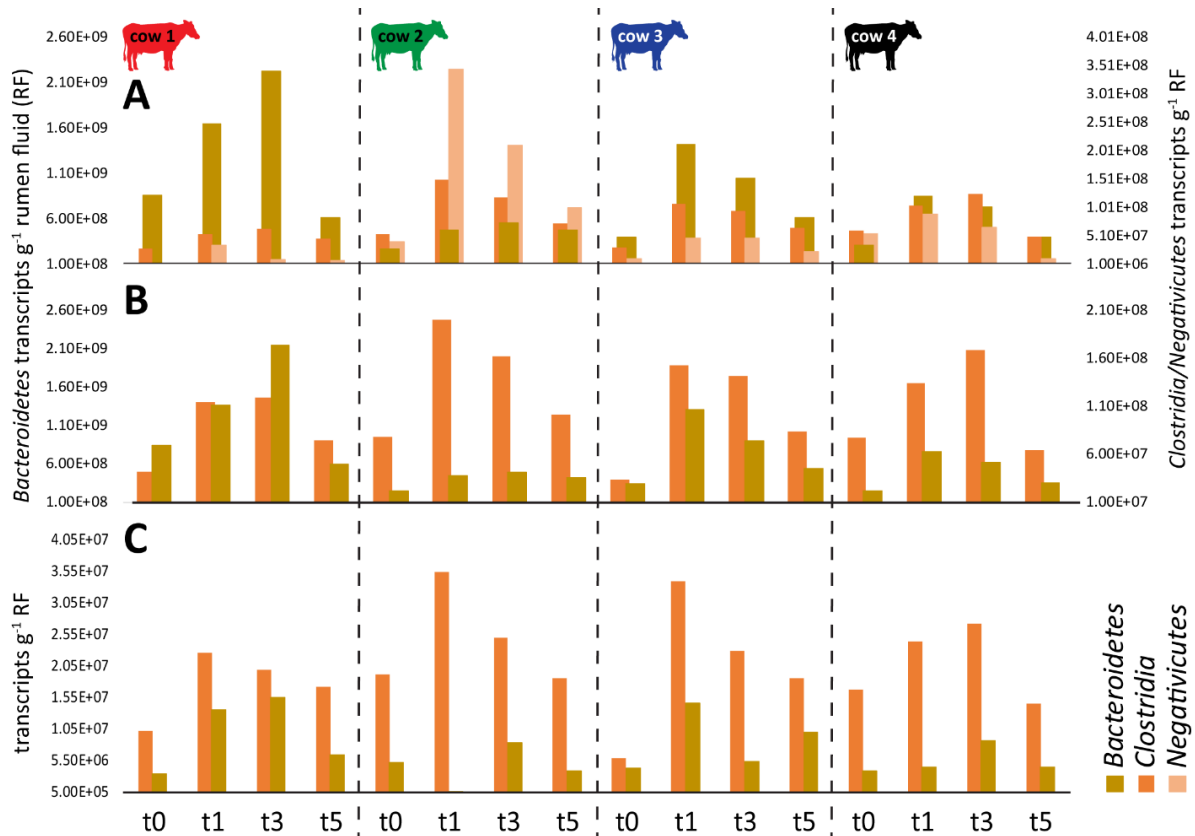

93

94 **Supplementary Figure S7. Quantified transcripts involved in acetate production/turnover.** Bar charts  
 95 showing quantified transcripts (g<sup>-1</sup> rumen fluid) of *Bacteroidetes* (mainly *Prevotella*), *Clostridiales*  
 96 (*Clostridia*) and *Negativicutes* possibly involved in acetate production from pyruvate in the rumen, i.e.  
 97 (A) via acetyl-CoA, (B) via acetyl-CoA and acetyl-P, (C) direct production from pyruvate via *poxB*  
 98 (pyruvate:ubiquinone oxidoreductase). Each bar summarizes all possibly involved enzymes (ECs) at a  
 99 certain timepoint divided by the number of steps for each pathway (see Supplementary Figure S6). X-  
 100 axis: before feeding (t0), one, three, five hours after feeding started (t1, t3, t5).

101



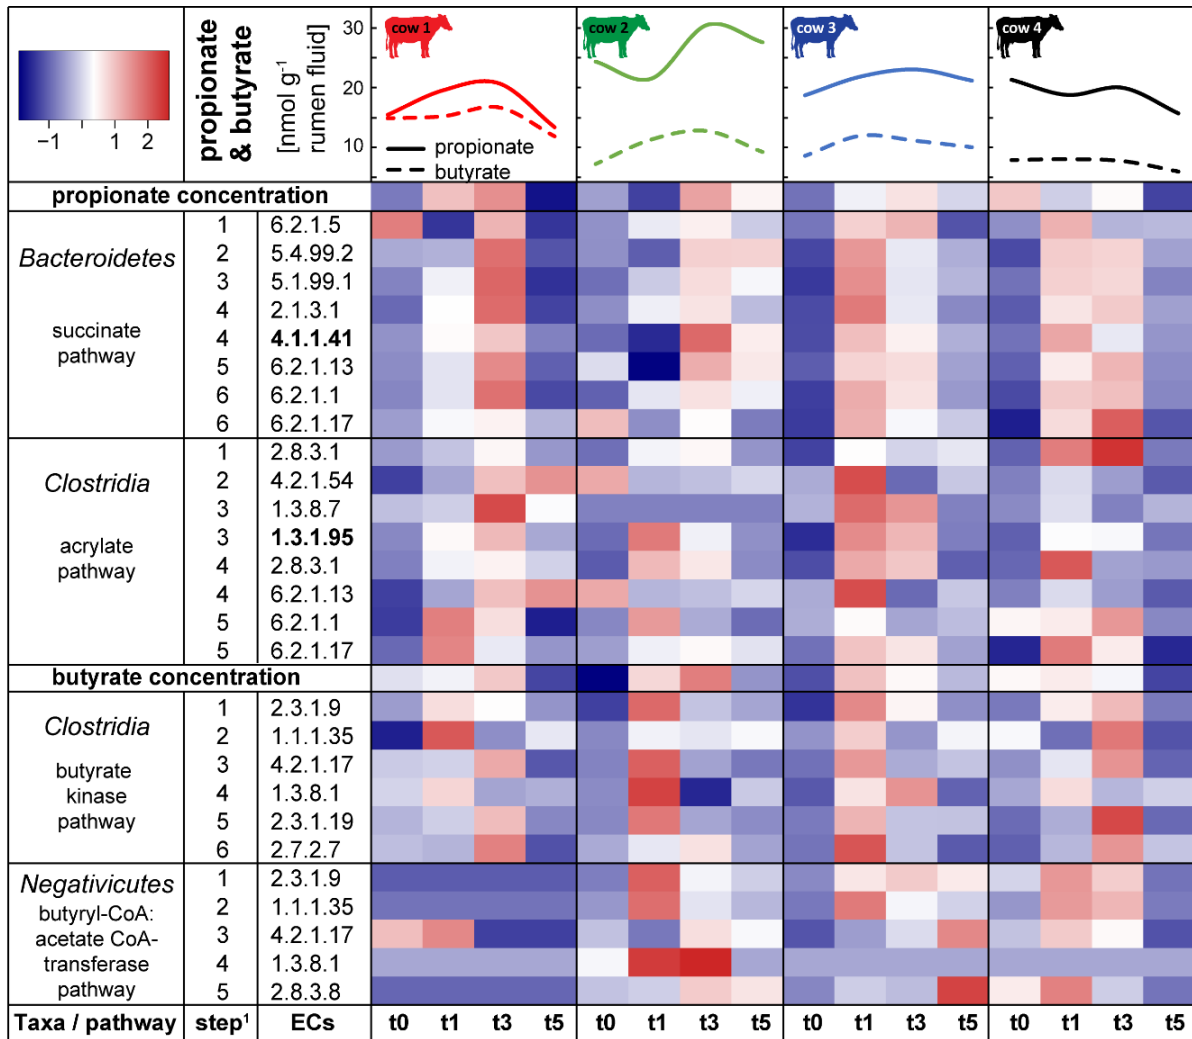

102

103

104

105

106

107

108

109

110

111

**Supplementary Figure S8. Dynamics and distribution of transcripts involved in propionate and butyrate production in the rumen.** Heatmap depicting the dynamics of quantified transcripts (encoded by their EC numbers) involved in propionate production (turnover) from succinate (succinate pathway) and lactate (acrylate pathway) and butyrate production (turnover) from acetyl-CoA by the rumen microbiome separated for the individual cows. ECs in bold indicate production specific transcripts. Propionate and butyrate concentrations measured before feeding (t0) and one (t1), three (t3) and five (t5) hours after the feeding started are depicted as heatmaps and total (nmol g<sup>-1</sup> rumen fluid). <sup>1</sup>Numbers indicate in which step of the pathway the respective enzymes are involved. The butyryl-CoA:acetate CoA-transferase pathway (*Negativicutes*) was not detected in cow 1.

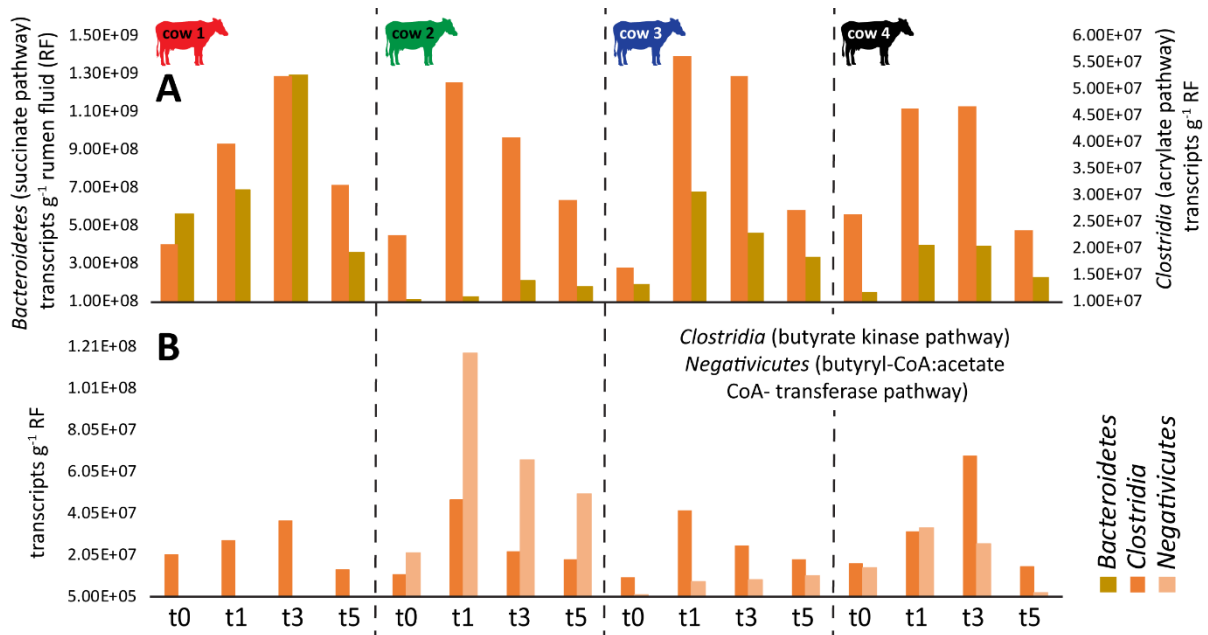

112

113 **Supplementary Figure S9. Quantified transcripts involved in propionate and butyrate**  
 114 **production/turnover.** Bar charts showing quantified transcripts ( $g^{-1}$  rumen fluid) of *Bacteroidetes*  
 115 (mainly *Prevotella*), *Clostridiales* (*Clostridia*) and *Negativicutes* possibly involved in propionate  
 116 production (A) from succinate (succinate pathway) and lactate (acrylate pathway) and butyrate  
 117 production (B) from acetyl-CoA in the rumen. Each bar summarizes all possibly involved enzymes (ECs)  
 118 at a certain timepoint divided by the number of steps for each pathway (see Supplementary Figure S8).  
 119 X-axis: before feeding (t0), one, three, five hours after feeding started (t1, t3, t5).

120 **Supplementary Table S1. Composition of the diet fed to the rumen-cannulated Holstein dairy cows.**  
 121 Cows were fed twice a day in a semi-restrictive way (see Methods section, Fig. 1a, and Supplementary  
 122 Figure S1).

| Dietary composition <sup>1</sup>        |       |
|-----------------------------------------|-------|
| Spring barley                           | 217.9 |
| Rape seed cake (12% fat)                | 221.5 |
| Clover grass silage                     | 303.5 |
| Corn silage                             | 244.8 |
| Sodium Chloride                         | 1.6   |
| Vitamins and minerals                   | 10.2  |
| Chemical composition <sup>1</sup>       |       |
| Dry matter content [g/kg ] <sup>2</sup> | 446   |
| Ash <sup>3</sup>                        | 65    |
| Crude protein <sup>4</sup>              | 157   |
| Fat <sup>5</sup>                        | 36    |
| Neutral detergent fibre <sup>6</sup>    | 340   |

123 <sup>1</sup> Given in g/kg DM if nothing else is stated. <sup>2</sup> The dry matter concentration was determined by drying the samples for 48  
 124 hours at 60°C. <sup>3</sup> Ash was determined by combustion at 525°C for 6 hours. <sup>4</sup> Nitrogen was determined by the Dumas principle  
 125 as described by Hansen [1] using a Vario MAX CN (Elementar Analysensysteme GmbH, Hanau, Germany), and crude protein  
 126 was calculated as N x 6.25. <sup>5</sup> Crude fat was measured by Soxhlet extraction with petroleum ether (Soltex 2050, Foss Analytical,  
 127 Hillerød, Denmark) after hydrolysis with HCl [2]. <sup>6</sup> Ash-free neutral detergent fibre was measured by Fibertec™ M 6 system  
 128 (Foss Analytical, Hillerød, Denmark) using heat stable amylase and sodium sulphite as described by Mertens [3].  
 129

130 **Supplementary Table S2. Daily dry matter intake (kg/day) for the four cows on the four experimental**  
 131 **days.** The dry matter intake was calculated as feed given minus leftovers multiple with dry matter  
 132 concentration of diet. The cows had a dry matter intake at 20.8 and 20.0 kg dry matter on the days  
 133 with ad libitum and restricted feeding, respectively, and the intake did not differ between days with  
 134 ad libitum and restricted feeding (t-test, P = 0.49). The cows had an intake of  $14.5 \pm 2.2$  (mean  $\pm$   
 135 standard deviation) and  $9.8 \pm 1.6$  kg dry matter between 7 am and 6 pm on days with ad libitum feeding  
 136 (day 1 and 3) and restricted feeding (day 2 and day 4), respectively, but the intake did not differ  
 137 between day 1 and 3 and day 2 and 4 (t-test; day 1 versus day 3, P = 0.65; day 2 versus day 4, P = 0.95;  
 138 ad libitum versus restricted, P = 0.0002). The cows had a dry matter intake at  $2.7 \pm 1.6$  and  $3.5 \pm 0.6$  kg  
 139 between 7:00 and 8:00 on the days with rumen sampling and methane measurements, respectively,  
 140 and the intake did not differ between the days (t-test, P = 0.43). For detail on the experimental setup  
 141 see Methods section.

| Time        | Cow ID | Day 1 | Day 2 | Day 3 | Day 4 |
|-------------|--------|-------|-------|-------|-------|
| 24 h        | Cow 1  | 19.2  | 15.4  | 19.9  | 20.1  |
|             | Cow 2  | 20.9  | 22.5  | 22.3  | 20.4  |
|             | Cow 3  | 19.4  | 18.2  | 19.1  | 20.1  |
|             | Cow 4  | 22.5  | 20.5  | 22.7  | 23.2  |
| 7 am – 6 pm | Cow 1  | 15.2  | 8.2   | 12.7  | 9.3   |
|             | Cow 2  | 18.2  | 12.1  | 17.3  | 10.4  |
|             | Cow 3  | 12.5  | 8.0   | 12.1  | 8.3   |
|             | Cow 4  | 14.0  | 10.7  | 14.5  | 11.4  |
| 7 am – 8 am | Cow 1  |       | 3.6   |       | 4.3   |
|             | Cow 2  |       | 4.4   |       | 3.3   |
|             | Cow 3  |       | 2.3   |       | 3.3   |
|             | Cow 4  |       | 0.6   |       | 3.0   |

142

143 **Supplementary Table S3. Overview of sequencing and data processing results.**

| sample ID   | raw sequences <sup>1</sup> | after pre-processing <sup>2</sup> |                     | SortMeRNA results <sup>3</sup> |            | annotation of mRNA |                   |
|-------------|----------------------------|-----------------------------------|---------------------|--------------------------------|------------|--------------------|-------------------|
|             | no. of read pairs          | no. of reads                      | average read length | rRNA reads                     | mRNA reads | DIAMOND            | pfam <sup>4</sup> |
| c1_07h (t0) | 65,317,599                 | 60,466,622                        | 214                 | 52,334,976                     | 8,131,646  | 3,365,969          | 410,419           |
| c2_07h (t0) | 59,186,503                 | 51,812,887                        | 214                 | 42,488,514                     | 9,324,373  | 3,365,969          | 290,817           |
| c3_07h (t0) | 75,330,840                 | 53,433,658                        | 215                 | 43,639,108                     | 9,794,550  | 3,365,969          | 368,829           |
| c4_07h (t0) | 53,259,101                 | 62,901,199                        | 217                 | 52,540,980                     | 10,360,219 | 3,365,969          | 342,208           |
| c1_08h (t1) | 66,549,413                 | 59,656,114                        | 209                 | 51,068,193                     | 8,587,921  | 3,365,969          | 491,989           |
| c2_08h (t1) | 67,146,045                 | 59,149,252                        | 215                 | 50,666,579                     | 8,482,673  | 3,365,969          | 424,483           |
| c3_08h (t1) | 63,379,266                 | 53,417,765                        | 198                 | 44,106,590                     | 9,311,175  | 3,365,969          | 417,605           |
| c4_08h (t1) | 63,533,899                 | 36,342,383                        | 191                 | 29,672,369                     | 6,670,014  | 3,365,969          | 304,716           |
| c1_10h (t3) | 64,634,701                 | 58,801,041                        | 219                 | 50,430,178                     | 8,370,863  | 3,365,969          | 542,244           |
| c2_10h (t3) | 66,938,760                 | 42,031,443                        | 223                 | 35,888,902                     | 6,142,541  | 3,365,969          | 399,755           |
| c3_10h (t3) | 67,312,364                 | 58,695,012                        | 207                 | 48,385,273                     | 10,309,739 | 3,365,969          | 384,594           |
| c4_10h (t3) | 65,740,801                 | 48,605,118                        | 217                 | 42,611,059                     | 5,994,059  | 3,365,969          | 478,864           |
| c1_12h (t5) | 62,897,615                 | 58,136,430                        | 224                 | 52,364,413                     | 5,772,017  | 3,365,969          | 467,908           |
| c2_12h (t5) | 66,954,185                 | 62,273,447                        | 214                 | 54,042,405                     | 8,231,042  | 3,365,969          | 387,441           |
| c3_12h (t5) | 71,966,923                 | 50,534,927                        | 221                 | 44,197,682                     | 6,337,245  | 3,365,969          | 370,793           |
| c4_12h (t5) | 62,238,171                 | 57,829,771                        | 220                 | 49,765,881                     | 8,063,890  | 3,365,969          | 395,907           |

144 <sup>1</sup>read length 125 bp; sequenced on a Illumina HiSeq 2500 125 bp; <sup>2</sup>after overlapping the reads, trimming and quality filtering; <sup>3</sup>SortMeRNA separated rRNA and putative mRNA reads based on the  
145 SILVA db; <sup>4</sup>number of reads annotated to a protein family from a subsample (2,000,000 reads) of total mRNA reads

**Supplementary Table S4. Relative abundance<sup>1</sup> of eukaryotic, bacterial and archaeal SSU rRNA reads [%]. c1 - c4, cow 1 – 4.**

| taxon sting                                                               | c1_t0 | c1_t1 | c1_t3 | c1_t5 | c2_t0 | c2_t1 | c2_t3 | c2_t5 | c3_t0 | c3_t1 | c3_t3 | c3_t5 | c4_t0 | c4_t1 | c4_t3 | c4_t5 |
|---------------------------------------------------------------------------|-------|-------|-------|-------|-------|-------|-------|-------|-------|-------|-------|-------|-------|-------|-------|-------|
| unassigned Eukaryota                                                      | 1.03  | 0.93  | 0.92  | 1.69  | 0.31  | 0.30  | 0.49  | 0.59  | 0.62  | 0.63  | 0.84  | 0.62  | 0.41  | 0.18  | 0.55  | 1.53  |
| Metazoa                                                                   | 0.33  | 0.55  | 0.68  | 0.73  | 0.20  | 0.21  | 0.29  | 0.32  | 0.37  | 0.53  | 0.65  | 0.50  | 0.40  | 0.22  | 0.58  | 1.14  |
| Alveolata; Apicomplexa; Aconoidasida; Piroplasmida                        | 0.53  | 0.73  | 0.61  | 0.73  | 0.12  | 0.14  | 0.19  | 0.21  | 0.26  | 0.53  | 0.52  | 0.38  | 0.36  | 0.27  | 0.39  | 0.96  |
| Alveolata; Ciliophora; Litostomatea; unassigned Litostomatea              | 0.12  | 0.14  | 0.19  | 0.18  | 0.02  | 0.02  | 0.03  | 0.01  | 0.06  | 0.06  | 0.11  | 0.05  | 0.07  | 0.06  | 0.14  | 0.12  |
| Alveolata; Ciliophora; Litostomatea; other Litostomatea                   | 0.03  | 0.06  | 0.04  | 0.04  | 0.00  | 0.00  | 0.00  | 0.00  | 0.02  | 0.01  | 0.02  | 0.02  | 0.01  | 0.01  | 0.04  | 0.02  |
| Alveolata; Ciliophora; Litostomatea; unassigned Entodiniomorphida         | 3.85  | 2.42  | 3.83  | 1.70  | 0.43  | 0.67  | 0.34  | 0.17  | 0.96  | 0.94  | 1.17  | 0.32  | 1.10  | 0.16  | 1.49  | 1.01  |
| Alveolata; Ciliophora; Litostomatea; unassigned Ophryoscolecidae          | 9.26  | 6.51  | 7.65  | 6.88  | 0.84  | 1.15  | 0.64  | 0.31  | 2.98  | 2.58  | 3.04  | 2.43  | 4.81  | 1.52  | 5.75  | 4.40  |
| Alveolata; Ciliophora; Litostomatea; Entodinium                           | 8.89  | 7.42  | 7.15  | 10.29 | 0.19  | 0.13  | 0.20  | 0.12  | 2.46  | 1.82  | 3.41  | 2.27  | 2.01  | 0.77  | 1.36  | 5.15  |
| Alveolata; Ciliophora; Litostomatea; Epidinium                            | 8.21  | 5.79  | 8.05  | 2.59  | 1.00  | 1.77  | 0.91  | 0.39  | 2.17  | 2.42  | 2.78  | 0.43  | 3.21  | 1.15  | 4.19  | 1.68  |
| Alveolata; Ciliophora; Litostomatea; Eremoplastron                        | 0.00  | 0.00  | 0.01  | 0.00  | 0.00  | 0.00  | 0.00  | 0.00  | 0.00  | 0.01  | 0.01  | 0.02  | 0.05  | 0.03  | 0.11  | 0.01  |
| Alveolata; Ciliophora; Litostomatea; Eudiplodinium                        | 0.00  | 0.00  | 0.01  | 0.00  | 0.00  | 0.00  | 0.00  | 0.00  | 0.00  | 0.01  | 0.01  | 0.00  | 0.02  | 0.02  | 0.09  | 0.01  |
| Alveolata; Ciliophora; Litostomatea; Isotricha                            | 4.07  | 8.04  | 5.71  | 3.50  | 1.19  | 1.73  | 1.01  | 0.95  | 5.39  | 4.95  | 4.33  | 9.79  | 2.03  | 9.16  | 18.69 | 5.32  |
| Alveolata; Ciliophora; Litostomatea; Dasytricha                           | 0.92  | 0.88  | 0.73  | 0.50  | 0.00  | 0.00  | 0.00  | 0.00  | 0.01  | 0.01  | 0.33  | 0.09  | 0.15  | 0.17  | 0.01  | 0.01  |
| Alveolata; Ciliophora; Spirotrichea; unassigned Spirotrichea              | 0.05  | 0.07  | 0.07  | 0.11  | 0.03  | 0.04  | 0.04  | 0.06  | 0.09  | 0.10  | 0.14  | 0.18  | 0.12  | 0.05  | 0.16  | 0.19  |
| Alveolata; Ciliophora; Colpodea; unassigned Colpodea                      | 0.02  | 0.02  | 0.01  | 0.02  | 0.01  | 0.02  | 0.02  | 0.03  | 0.01  | 0.02  | 0.03  | 0.01  | 0.01  | 0.01  | 0.00  | 0.02  |
| Alveolata; Ciliophora; Phyllopharyngea; Chonotrichia                      | 0.14  | 0.13  | 0.13  | 0.11  | 0.03  | 0.05  | 0.03  | 0.04  | 0.23  | 0.32  | 0.18  | 0.09  | 0.12  | 0.06  | 0.13  | 0.52  |
| Alveolata; low abundant Alveolata                                         | 0.05  | 0.04  | 0.05  | 0.10  | 0.05  | 0.03  | 0.02  | 0.03  | 0.04  | 0.04  | 0.05  | 0.02  | 0.03  | 0.02  | 0.04  | 0.05  |
| Fungi; unassigned Fungi                                                   | 0.03  | 0.04  | 0.06  | 0.06  | 0.01  | 0.00  | 0.00  | 0.01  | 0.02  | 0.02  | 0.01  | 0.02  | 0.02  | 0.00  | 0.01  | 0.02  |
| Fungi; Dikarya; unassigned Dikarya                                        | 0.06  | 0.09  | 0.04  | 0.08  | 0.07  | 0.08  | 0.08  | 0.14  | 0.03  | 0.08  | 0.08  | 0.04  | 0.05  | 0.07  | 0.05  | 0.11  |
| Fungi; Dikarya; Ascomycota                                                | 0.08  | 0.42  | 0.13  | 0.16  | 0.13  | 0.31  | 0.27  | 0.21  | 0.13  | 0.34  | 0.22  | 0.14  | 0.29  | 0.21  | 0.13  | 0.13  |
| Fungi; Dikarya; Basidiomycota                                             | 0.05  | 0.05  | 0.03  | 0.07  | 0.03  | 0.03  | 0.02  | 0.05  | 0.11  | 0.09  | 0.08  | 0.07  | 0.08  | 0.03  | 0.07  | 0.18  |
| Fungi; Chytridiomycota                                                    | 0.02  | 0.03  | 0.02  | 0.04  | 0.02  | 0.01  | 0.01  | 0.03  | 0.01  | 0.01  | 0.01  | 0.02  | 0.02  | 0.01  | 0.01  | 0.03  |
| Fungi; Neocallimastigomycota; Neocallimastigomycetes; Neocallimastigaceae | 1.29  | 2.19  | 2.18  | 3.09  | 0.44  | 0.42  | 0.23  | 0.32  | 0.99  | 0.68  | 0.83  | 1.12  | 0.67  | 0.38  | 0.66  | 1.16  |
| Fungi; low abundant Fungi                                                 | 0.00  | 0.00  | 0.00  | 0.00  | 0.00  | 0.00  | 0.00  | 0.00  | 0.00  | 0.00  | 0.00  | 0.00  | 0.00  | 0.00  | 0.00  | 0.01  |
| Parabasalia; unassigned Parabasalia                                       | 0.00  | 0.00  | 0.00  | 0.01  | 0.81  | 0.55  | 0.89  | 1.52  | 0.11  | 0.08  | 0.13  | 1.44  | 0.41  | 0.25  | 0.58  | 0.29  |
| Parabasalia; Trichomonadida; Trichomonadidae                              | 0.05  | 0.03  | 0.06  | 0.11  | 4.92  | 4.38  | 5.27  | 11.16 | 0.79  | 0.59  | 1.04  | 13.14 | 2.05  | 2.49  | 4.90  | 2.68  |
| Parabasalia; Hypotrichomonadida                                           | 0.07  | 0.04  | 0.02  | 0.08  | 0.01  | 0.01  | 0.00  | 0.02  | 0.13  | 0.14  | 0.15  | 0.01  | 0.01  | 0.00  | 0.01  | 0.28  |
| Parabasalia; low abundant Parabasalia                                     | 0.00  | 0.00  | 0.00  | 0.00  | 0.01  | 0.00  | 0.00  | 0.00  | 0.00  | 0.00  | 0.00  | 0.00  | 0.01  | 0.00  | 0.00  | 0.00  |
| Stramenopiles                                                             | 0.02  | 0.04  | 0.04  | 0.04  | 0.02  | 0.01  | 0.01  | 0.02  | 0.01  | 0.02  | 0.03  | 0.02  | 0.02  | 0.00  | 0.02  | 0.02  |
| Viridiplantae                                                             | 0.08  | 0.07  | 0.05  | 0.08  | 0.11  | 0.10  | 0.14  | 0.25  | 0.07  | 0.06  | 0.09  | 0.11  | 0.07  | 0.06  | 0.07  | 0.18  |
| Rhizaria                                                                  | 0.08  | 0.07  | 0.12  | 0.12  | 0.03  | 0.02  | 0.03  | 0.04  | 0.09  | 0.14  | 0.29  | 0.11  | 0.06  | 0.04  | 0.10  | 0.30  |
| Amoebozoa; unassigned Amoebozoa                                           | 0.01  | 0.01  | 0.01  | 0.02  | 0.02  | 0.02  | 0.02  | 0.04  | 0.01  | 0.01  | 0.02  | 0.02  | 0.00  | 0.01  | 0.02  | 0.04  |
| Amoebozoa; Tubulinea; unassigned Tubulinea                                | 0.02  | 0.02  | 0.02  | 0.02  | 0.02  | 0.01  | 0.03  | 0.04  | 0.01  | 0.01  | 0.02  | 0.01  | 0.01  | 0.02  | 0.01  | 0.03  |
| Amoebozoa; Archamoebae; Mastigamoebidae; Mastigamoeba                     | 0.50  | 0.33  | 0.39  | 0.64  | 0.47  | 0.48  | 0.61  | 0.81  | 0.26  | 0.38  | 0.39  | 0.37  | 0.24  | 0.14  | 0.36  | 0.84  |
| Amoebozoa; Flabellinea; Vannellidae                                       | 0.08  | 0.07  | 0.07  | 0.13  | 0.01  | 0.01  | 0.02  | 0.02  | 0.03  | 0.02  | 0.07  | 0.03  | 0.01  | 0.03  | 0.02  | 0.08  |
| Amoebozoa; low abundant Amoebozoa                                         | 0.00  | 0.00  | 0.01  | 0.01  | 0.01  | 0.02  | 0.01  | 0.01  | 0.01  | 0.00  | 0.00  | 0.01  | 0.01  | 0.00  | 0.01  | 0.00  |
| Glaucocystophyceae                                                        | 0.04  | 0.04  | 0.04  | 0.06  | 0.01  | 0.01  | 0.00  | 0.00  | 0.00  | 0.01  | 0.01  | 0.00  | 0.00  | 0.00  | 0.00  | 0.01  |
| Eccrinales                                                                | 0.01  | 0.02  | 0.02  | 0.03  | 0.00  | 0.01  | 0.02  | 0.01  | 0.01  | 0.01  | 0.01  | 0.01  | 0.00  | 0.00  | 0.01  | 0.02  |
| low abundant Eukaryota                                                    | 0.03  | 0.03  | 0.04  | 0.08  | 0.02  | 0.02  | 0.02  | 0.04  | 0.02  | 0.03  | 0.04  | 0.02  | 0.01  | 0.00  | 0.02  | 0.09  |
| unassigned Bacteria                                                       | 0.04  | 0.09  | 0.04  | 0.11  | 0.10  | 0.12  | 0.11  | 0.09  | 0.16  | 0.22  | 0.20  | 0.16  | 0.11  | 0.17  | 0.12  | 0.18  |
| Proteobacteria; unassigned Proteobacteria                                 | 0.00  | 0.02  | 0.02  | 0.03  | 0.01  | 0.08  | 0.24  | 0.16  | 0.02  | 0.21  | 0.35  | 0.01  | 0.05  | 0.29  | 0.04  | 0.08  |
| Proteobacteria; Gammaproteobacteria; unassigned Gammaproteobacteria       | 0.00  | 0.02  | 0.01  | 0.02  | 0.03  | 0.05  | 0.12  | 0.04  | 0.01  | 0.05  | 0.07  | 0.01  | 0.03  | 0.03  | 0.02  | 0.02  |



|                                                                                           |      |      |      |      |      |       |       |      |      |      |      |      |      |      |      |      |
|-------------------------------------------------------------------------------------------|------|------|------|------|------|-------|-------|------|------|------|------|------|------|------|------|------|
| Tenericutes; Mollicutes; Anaeroplasmatales; Anaeroplasmataceae                            | 0.60 | 0.43 | 0.61 | 1.16 | 0.18 | 0.22  | 0.29  | 0.28 | 0.52 | 0.50 | 0.45 | 0.53 | 0.35 | 0.25 | 0.24 | 0.56 |
| Tenericutes; Mollicutes; other Mollicutes                                                 | 0.02 | 0.03 | 0.03 | 0.11 | 0.28 | 0.21  | 0.23  | 0.21 | 0.28 | 0.25 | 0.26 | 0.36 | 0.45 | 0.28 | 0.29 | 0.32 |
| Tenericutes; low abundant Tenericutes                                                     | 0.02 | 0.02 | 0.01 | 0.03 | 0.01 | 0.01  | 0.01  | 0.03 | 0.02 | 0.02 | 0.03 | 0.01 | 0.02 | 0.01 | 0.01 | 0.03 |
| RF3                                                                                       | 0.04 | 0.02 | 0.02 | 0.06 | 0.01 | 0.00  | 0.02  | 0.02 | 0.04 | 0.04 | 0.03 | 0.02 | 0.02 | 0.00 | 0.00 | 0.03 |
| Lentisphaerae; Lentisphaeria; Victivallales; Victivallaceae                               | 0.01 | 0.02 | 0.01 | 0.03 | 0.13 | 0.18  | 0.18  | 0.26 | 0.13 | 0.16 | 0.18 | 0.23 | 0.08 | 0.09 | 0.07 | 0.18 |
| Lentisphaerae; Lentisphaeria; RFP12 gut group                                             | 0.09 | 0.11 | 0.09 | 0.19 | 0.22 | 0.30  | 0.38  | 0.45 | 0.30 | 0.34 | 0.37 | 0.71 | 0.25 | 0.39 | 0.29 | 0.33 |
| Lentisphaerae; low abundant Lentisphaerae                                                 | 0.01 | 0.00 | 0.00 | 0.00 | 0.01 | 0.00  | 0.00  | 0.00 | 0.01 | 0.01 | 0.00 | 0.01 | 0.00 | 0.01 | 0.01 | 0.01 |
| Spirochaetes; Spirochaetes (class); Spirochaetales; Spirochaetaceae                       | 1.63 | 2.16 | 2.13 | 3.93 | 4.32 | 6.21  | 6.00  | 6.17 | 3.23 | 5.20 | 4.51 | 3.12 | 3.16 | 2.72 | 2.11 | 3.31 |
| Spirochaetes; Spirochaetes (class); Spirochaetales; PL-11B10                              | 0.00 | 0.00 | 0.00 | 0.00 | 0.00 | 0.00  | 0.00  | 0.00 | 0.10 | 0.20 | 0.21 | 0.04 | 0.03 | 0.03 | 0.02 | 0.30 |
| Spirochaetes; low abundant Spirochaetes                                                   | 0.00 | 0.00 | 0.00 | 0.00 | 0.00 | 0.00  | 0.00  | 0.00 | 0.00 | 0.00 | 0.00 | 0.00 | 0.00 | 0.00 | 0.00 | 0.00 |
| Candidate division TM7                                                                    | 0.02 | 0.02 | 0.02 | 0.01 | 0.15 | 0.10  | 0.11  | 0.10 | 0.05 | 0.05 | 0.05 | 0.07 | 0.09 | 0.07 | 0.07 | 0.04 |
| Synergistetes; Synergista; Synergistales; Synergistaceae                                  | 0.06 | 0.09 | 0.05 | 0.05 | 0.03 | 0.06  | 0.02  | 0.02 | 0.06 | 0.06 | 0.06 | 0.02 | 0.03 | 0.06 | 0.02 | 0.03 |
| Elusimicrobia; Elusimicrobia (class); Elusimicrobiales; Elusimicrobiaceae                 | 0.01 | 0.00 | 0.00 | 0.01 | 0.19 | 0.21  | 0.21  | 0.17 | 0.08 | 0.08 | 0.13 | 0.23 | 0.20 | 0.16 | 0.12 | 0.14 |
| Elusimicrobia; low abundant Elusimicrobia                                                 | 0.01 | 0.00 | 0.01 | 0.01 | 0.00 | 0.00  | 0.00  | 0.00 | 0.01 | 0.01 | 0.01 | 0.01 | 0.00 | 0.00 | 0.01 | 0.01 |
| Candidate division SR1                                                                    | 0.00 | 0.00 | 0.00 | 0.00 | 0.03 | 0.02  | 0.02  | 0.02 | 0.10 | 0.13 | 0.11 | 0.12 | 0.15 | 0.15 | 0.12 | 0.13 |
| Fibrobacteres; Fibrobacteria; Fibrobacterales; Fibrobacteraceae                           | 0.70 | 1.47 | 1.13 | 1.48 | 3.65 | 11.18 | 11.46 | 8.65 | 2.84 | 5.15 | 5.17 | 7.50 | 2.95 | 4.64 | 3.60 | 4.60 |
| Fibrobacteres; low abundant Fibrobacteres                                                 | 0.00 | 0.00 | 0.00 | 0.00 | 0.00 | 0.00  | 0.00  | 0.00 | 0.00 | 0.00 | 0.00 | 0.00 | 0.00 | 0.00 | 0.00 | 0.00 |
| Candidate division TM6                                                                    | 0.01 | 0.02 | 0.02 | 0.03 | 0.00 | 0.00  | 0.00  | 0.00 | 0.01 | 0.01 | 0.02 | 0.03 | 0.02 | 0.01 | 0.02 | 0.04 |
| low abundant Bacteria                                                                     | 0.01 | 0.02 | 0.02 | 0.02 | 0.02 | 0.01  | 0.02  | 0.02 | 0.03 | 0.04 | 0.02 | 0.03 | 0.02 | 0.02 | 0.02 | 0.03 |
| Euryarchaeota; Thermoplasmata; Methanomassiliococcales; Methanomassiliococcales GIT clade | 0.16 | 0.23 | 0.20 | 0.36 | 0.20 | 0.22  | 0.23  | 0.24 | 0.13 | 0.14 | 0.12 | 0.11 | 0.19 | 0.12 | 0.10 | 0.14 |
| Euryarchaeota; Thermoplasmata; Thermoplasmatales; unassigned Thermoplasmatales            | 0.00 | 0.00 | 0.00 | 0.00 | 0.00 | 0.00  | 0.00  | 0.00 | 0.00 | 0.00 | 0.00 | 0.00 | 0.00 | 0.00 | 0.00 | 0.00 |
| Euryarchaeota; Methanobacteria; Methanomacteriales; unassigned Methanobacteriaceae        | 0.03 | 0.03 | 0.02 | 0.06 | 0.02 | 0.01  | 0.01  | 0.01 | 0.03 | 0.03 | 0.03 | 0.02 | 0.01 | 0.02 | 0.01 | 0.03 |
| Euryarchaeota; Methanobacteria; Methanomacteriales; Methanobrevibacter                    | 0.10 | 0.08 | 0.06 | 0.17 | 0.19 | 0.13  | 0.10  | 0.17 | 0.09 | 0.10 | 0.12 | 0.18 | 0.21 | 0.15 | 0.09 | 0.11 |
| Euryarchaeota; Methanobacteria; Methanomacteriales; Methanosphaera                        | 0.01 | 0.01 | 0.01 | 0.01 | 0.02 | 0.02  | 0.01  | 0.01 | 0.00 | 0.00 | 0.01 | 0.01 | 0.01 | 0.01 | 0.00 | 0.02 |
| Euryarchaeota; Methanomicrobia; Methanosarcinales; Methanosarcinaceae                     | 0.00 | 0.00 | 0.00 | 0.00 | 0.00 | 0.00  | 0.00  | 0.00 | 0.00 | 0.00 | 0.00 | 0.00 | 0.00 | 0.00 | 0.00 | 0.00 |



## Supplementary Table S5. Significantly higher expressed functions one hour after ruminant feed intake.

| Fig. 3<br>ID | Differential gene expression analysis (edgeR)                    |       |                  | SEED subsystems             |                                    |                                                             |
|--------------|------------------------------------------------------------------|-------|------------------|-----------------------------|------------------------------------|-------------------------------------------------------------|
|              | SEED functions (level 4)                                         | logFC | FDR <sup>1</sup> | level 1                     | level 2                            | level 3                                                     |
| 1            | Fumarate reductase subunit C                                     | 4.70  | ***              | Respiration                 | Electron donating reactions        | Succinate_dehydrogenase                                     |
| 2            | Putative phosphatase YqaB                                        | 3.76  | **               | DNA Metabolism              | DNA repair                         | 2-phosphoglycolate_salvage                                  |
| 3            | Lipid A biosynthesis (KDO) 2-(lauroyl)-lipid IVA acyltransferase | 2.68  | *                | Cell Wall and Capsule       | Gram-Negative cell wall components | KDO2-Lipid_A_biosynthesis                                   |
| 4            | DNA-directed RNA polymerase subunit B (EC 2.7.7.6)               | 2.18  | **               | RNA Metabolism              | Transcription                      | RNA_polymerase_archaeal                                     |
| 5            | DNA-directed RNA polymerase subunit N (EC 2.7.7.6)               | 2.01  | ***              | RNA Metabolism              | Transcription                      | RNA_polymerase_archaeal                                     |
| 6            | LSU ribosomal protein L7Ae                                       | 1.49  | **               | Protein Metabolism          | Protein biosynthesis               | Ribosome_LSU_bacterial                                      |
| 7            | 3-hydroxybutyryl-CoA dehydratase (EC 4.2.1.55)                   | 1.34  | *                | Carbohydrates               | Fermentation                       | Acetyl-CoA_fermentation_to_Butyrate                         |
| 8            | Phosphoenolpyruvate carboxykinase [ATP] (EC 4.1.1.49)            | 1.18  | **               | Carbohydrates               | Central carbohydrate metabolism    | Pyruvate_metabolism_l_anaplerotic_reactions_PEP             |
| 9            | Na()-translocating NADH-quinone reductase subunit F              | 1.17  | *                | Respiration                 | Electron donating reactions        | Na()-translocating_NADH-quinone_oxidoreductase <sup>2</sup> |
| 10           | LSU ribosomal protein L14p (L23e)                                | 1.11  | ***              | Protein Metabolism          | Protein biosynthesis               | Ribosome_LSU_bacterial                                      |
| 11           | Na()-translocating NADH-quinone reductase subunit C              | 1.03  | **               | Respiration                 | Electron donating reactions        | Na()-translocating_NADH-quinone_oxidoreductase <sup>2</sup> |
| 12           | NADH-ubiquinone oxidoreductase chain L (EC 1.6.5.3)              | 1.01  | **               | Respiration                 | Electron donating reactions        | Respiratory_Complex_I                                       |
| 13           | Choline binding protein A                                        | 1.00  | **               | Stress Response             | Osmotic stress                     | Choline_and_Betaine_Uptake_and_Betaine_Biosynthesis         |
| 14           | Cysteine desulfurase (EC 2.8.1.7), NifS subfamily                | 1.00  | *                | Amino Acids and Derivatives | Alanine, serine, and glycine       | Alanine_biosynthesis                                        |
| 15           | 6-phospho-beta-glucosidase (EC 3.2.1.86)                         | 0.92  | *                | Carbohydrates               | Di- and oligosaccharides           | Beta-Glucoside_Metabolism                                   |
| 16           | LSU ribosomal protein L24p (L26e)                                | 0.89  | ***              | Protein Metabolism          | Protein biosynthesis               | Ribosome_LSU_bacterial                                      |
| 17           | LSU ribosomal protein L10p (P0)                                  | 0.87  | **               | Protein Metabolism          | Protein biosynthesis               | Ribosome_LSU_bacterial                                      |
| 18           | LSU ribosomal protein L31p                                       | 0.84  | **               | Protein Metabolism          | Protein biosynthesis               | Ribosome_LSU_bacterial                                      |
| 19           | LSU ribosomal protein L27p                                       | 0.82  | ***              | Protein Metabolism          | Protein biosynthesis               | Ribosome_LSU_bacterial                                      |
| 20           | SSU ribosomal protein S8p (S15Ae)                                | 0.80  | ***              | Protein Metabolism          | Protein biosynthesis               | Ribosome_SSU_bacterial                                      |
| 21           | SSU ribosomal protein S4p (S9e)                                  | 0.79  | ***              | Protein Metabolism          | Protein biosynthesis               | Ribosome_SSU_bacterial                                      |
| 22           | LSU ribosomal protein L18p (L5e)                                 | 0.78  | **               | Protein Metabolism          | Protein biosynthesis               | Ribosome_LSU_bacterial                                      |
| 23           | SSU ribosomal protein S5p (S2e)                                  | 0.77  | ***              | Protein Metabolism          | Protein biosynthesis               | Ribosome_SSU_bacterial                                      |
| 24           | SSU ribosomal protein S3p (S3e)                                  | 0.76  | ***              | Protein Metabolism          | Protein biosynthesis               | Ribosome_SSU_bacterial                                      |
| 25           | SSU ribosomal protein S16p                                       | 0.75  | **               | Protein Metabolism          | Protein biosynthesis               | Ribosome_SSU_bacterial                                      |
| 26           | Biosynthetic arginine decarboxylase (EC 4.1.1.19)                | 0.75  | *                | Stress Response             | Acid stress                        | Acid_resistance_mechanisms                                  |
| 27           | SSU ribosomal protein S11p (S14e)                                | 0.73  | **               | Protein Metabolism          | Protein biosynthesis               | Ribosome_SSU_bacterial                                      |
| 28           | Ketol-acid reductoisomerase (EC 1.1.1.86)                        | 0.71  | *                | Amino Acids and Derivatives | Branched-chain amino acids         | Branched-Chain_Amino_Acid_Biosynthesis                      |
| 29           | LSU ribosomal protein L17p                                       | 0.70  | **               | Protein Metabolism          | Protein biosynthesis               | Ribosome_LSU_bacterial                                      |
| 30           | SSU ribosomal protein S13p (S18e)                                | 0.69  | **               | Protein Metabolism          | Protein biosynthesis               | Ribosome_SSU_bacterial                                      |
| 31           | Translation elongation factor G                                  | 0.68  | **               | Protein Metabolism          | Protein biosynthesis               | Universal_GTPases                                           |
| 32           | SSU ribosomal protein S14p (S29e)                                | 0.68  | **               | Protein Metabolism          | Protein biosynthesis               | Ribosome_SSU_bacterial                                      |
| 33           | LSU ribosomal protein L11p (L12e)                                | 0.68  | *                | Protein Metabolism          | Protein biosynthesis               | Ribosome_LSU_bacterial                                      |
| 34           | LSU ribosomal protein L1p (L10Ae)                                | 0.67  | **               | Protein Metabolism          | Protein biosynthesis               | Ribosome_LSU_bacterial                                      |
| 35           | LSU ribosomal protein L3p (L3e)                                  | 0.67  | **               | Protein Metabolism          | Protein biosynthesis               | Ribosome_LSU_bacterial                                      |
| 36           | LSU ribosomal protein L5p (L11e)                                 | 0.66  | **               | Protein Metabolism          | Protein biosynthesis               | Ribosome_LSU_bacterial                                      |
| 37           | SSU ribosomal protein S18p                                       | 0.65  | *                | Protein Metabolism          | Protein biosynthesis               | Ribosome_SSU_bacterial                                      |
| 38           | LSU ribosomal protein L30p (L7e)                                 | 0.65  | *                | Protein Metabolism          | Protein biosynthesis               | Ribosome_LSU_bacterial                                      |
| 39           | LSU ribosomal protein L16p (L10e)                                | 0.62  | **               | Protein Metabolism          | Protein biosynthesis               | Ribosome_LSU_bacterial                                      |
| 40           | LSU ribosomal protein L33p                                       | 0.62  | *                | Protein Metabolism          | Protein biosynthesis               | Ribosome_LSU_bacterial                                      |
| 41           | SSU ribosomal protein S1p                                        | 0.54  | *                | Protein Metabolism          | Protein biosynthesis               | Ribosome_SSU_bacterial                                      |
| 42           | SSU ribosomal protein S17p (S11e)                                | 0.52  | *                | Protein Metabolism          | Protein biosynthesis               | Ribosome_SSU_bacterial                                      |
| 43           | SSU ribosomal protein S9p (S16e)                                 | 0.50  | *                | Protein Metabolism          | Protein biosynthesis               | Ribosome_SSU_bacterial                                      |

<sup>1</sup>FDR, corrected p-value, \*\*\* ≤ 0.001, \*\* ≤ 0.01, \* ≤ 0.05 <sup>2</sup>Na()-translocating\_NADH-quinone\_oxidoreductase\_and\_rnf-like\_group\_of\_electron\_transport\_complexes

**Supplementary Table S6. Raw count data of carbohydrate active enzymes detected in the rumen metatranscriptomes. c1 - c4, cow 1 - 4; 7h (t0), 8h (t1), 10h (t3), 12h (t5)**

| Category                        | pfam model | name            | c1 7h | c2 7h | c3 7h | c4 7h | c1 8h | c2 8h | c3 8h | c4 8h | c1 10h | c2 10h | c3 10h | c4 10h | c1 12h | c2 12h | c3 12h | c4 12h |
|---------------------------------|------------|-----------------|-------|-------|-------|-------|-------|-------|-------|-------|--------|--------|--------|--------|--------|--------|--------|--------|
| Lignin - phenolics              | PF02578.10 | Cu-oxidase_4    | 47    | 27    | 49    | 30    | 61    | 42    | 54    | 36    | 65     | 43     | 57     | 32     | 54     | 41     | 47     | 45     |
|                                 | PF00775.16 | Dioxygenase_C   | 0     | 0     | 0     | 0     | 0     | 0     | 0     | 1     | 0      | 0      | 0      | 0      | 0      | 0      | 0      | 0      |
| Cellulases                      | PF12876.2  | Cellulase_like  | 1     | 1     | 2     | 1     | 1     | 6     | 0     | 0     | 1      | 4      | 2      | 0      | 0      | 3      | 1      | 1      |
|                                 | PF00150.13 | Cellulase       | 1419  | 404   | 537   | 834   | 901   | 747   | 732   | 441   | 1239   | 473    | 387    | 1544   | 692    | 351    | 522    | 525    |
|                                 | PF01341.12 | Glyco_hydro_6   | 3     | 1     | 2     | 1     | 2     | 3     | 1     | 2     | 4      | 1      | 4      | 0      | 8      | 2      | 2      | 5      |
|                                 | PF00759.14 | Glyco_hydro_9   | 2370  | 546   | 655   | 1123  | 1232  | 1033  | 922   | 725   | 1641   | 644    | 562    | 2273   | 804    | 489    | 570    | 629    |
|                                 | PF02011.10 | Glyco_hydro_48  | 68    | 276   | 125   | 208   | 55    | 267   | 209   | 183   | 58     | 372    | 242    | 223    | 119    | 338    | 212    | 236    |
|                                 | PF12891.2  | Glyco_hydro_44  | 0     | 14    | 9     | 12    | 2     | 12    | 7     | 5     | 1      | 16     | 16     | 9      | 7      | 24     | 7      | 12     |
|                                 | PF02015.11 | Glyco_hydro_45  | 2390  | 301   | 575   | 1224  | 1491  | 861   | 732   | 566   | 2096   | 246    | 392    | 2731   | 1174   | 151    | 560    | 439    |
| Hemicellulases                  | PF01270.12 | Glyco_hydro_8   | 14    | 39    | 48    | 63    | 16    | 52    | 41    | 32    | 17     | 68     | 49     | 51     | 41     | 75     | 100    | 74     |
|                                 | PF00331.15 | Glyco_hydro_10  | 1197  | 450   | 522   | 593   | 968   | 517   | 557   | 373   | 1319   | 412    | 393    | 816    | 747    | 381    | 478    | 454    |
|                                 | PF00457.12 | Glyco_hydro_11  | 395   | 113   | 120   | 216   | 274   | 129   | 143   | 128   | 297    | 99     | 88     | 367    | 201    | 123    | 147    | 146    |
|                                 | PF02156.10 | Glyco_hydro_26  | 444   | 119   | 149   | 258   | 262   | 219   | 207   | 144   | 451    | 130    | 159    | 450    | 250    | 120    | 155    | 153    |
|                                 | PF00295.12 | Glyco_hydro_28  | 79    | 35    | 56    | 38    | 84    | 34    | 54    | 29    | 93     | 35     | 46     | 37     | 79     | 35     | 51     | 53     |
|                                 | PF07745.8  | Glyco_hydro_53  | 143   | 77    | 183   | 98    | 104   | 96    | 151   | 95    | 179    | 112    | 127    | 84     | 184    | 105    | 137    | 154    |
| Pectinases                      | PF00295    | Glyco_hydro_28  | 79    | 35    | 56    | 38    | 84    | 34    | 54    | 29    | 93     | 35     | 46     | 37     | 79     | 35     | 51     | 53     |
| Chitinases                      | PF00704    | Glyco_hydro_18  | 111   | 9     | 26    | 23    | 49    | 18    | 25    | 7     | 82     | 15     | 27     | 43     | 110    | 23     | 24     | 26     |
| Glucosylceramidase              | PF02055    | Glyco_hydro_30  | 100   | 17    | 29    | 52    | 63    | 16    | 18    | 14    | 70     | 8      | 10     | 78     | 44     | 10     | 25     | 18     |
|                                 | PF06964.7  | Alpha-L-AF_C    | 178   | 78    | 190   | 88    | 163   | 122   | 144   | 85    | 236    | 73     | 103    | 77     | 165    | 110    | 131    | 125    |
|                                 | PF09206.6  | ArabFuran-catal | 2     | 6     | 2     | 2     | 0     | 4     | 2     | 1     | 0      | 5      | 3      | 1      | 3      | 7      | 5      | 1      |
|                                 | PF07477.7  | Glyco_hydro_67C | 48    | 32    | 29    | 27    | 41    | 27    | 33    | 41    | 57     | 11     | 33     | 26     | 65     | 24     | 42     | 22     |
|                                 | PF07488.7  | Glyco_hydro_67M | 74    | 22    | 57    | 31    | 55    | 34    | 54    | 27    | 97     | 14     | 46     | 27     | 70     | 23     | 55     | 51     |
|                                 | PF03648.9  | Glyco_hydro_67N | 2     | 1     | 3     | 0     | 3     | 2     | 1     | 0     | 3      | 3      | 3      | 1      | 3      | 0      | 2      | 3      |
|                                 | PF05592.6  | Bac_rhamnosid   | 127   | 41    | 104   | 54    | 85    | 55    | 98    | 49    | 124    | 55     | 77     | 89     | 103    | 53     | 81     | 79     |
|                                 | PF08531.5  | Bac_rhamnosid_N | 45    | 28    | 38    | 16    | 28    | 14    | 31    | 19    | 46     | 22     | 17     | 22     | 38     | 26     | 33     | 22     |
| Starch degrading enzymes        | PF00128    | Alpha-amylase   | 792   | 390   | 477   | 492   | 696   | 519   | 665   | 515   | 1097   | 524    | 674    | 882    | 1167   | 543    | 596    | 702    |
|                                 | PF03065    | Glyco_hydro_57  | 221   | 77    | 156   | 69    | 123   | 83    | 122   | 85    | 275    | 86     | 112    | 85     | 233    | 88     | 119    | 133    |
|                                 | PF02446    | Glyco_hydro_77  | 651   | 413   | 513   | 549   | 651   | 802   | 975   | 497   | 1307   | 888    | 817    | 831    | 1075   | 717    | 423    | 650    |
| Mannan, Galactomannan degrading | PF02156    | Glyco_hydro_26  | 444   | 119   | 149   | 258   | 262   | 219   | 207   | 144   | 451    | 130    | 159    | 450    | 250    | 120    | 155    | 153    |
|                                 | PF03663    | Glyco_hydro_76  | 10    | 3     | 6     | 0     | 7     | 1     | 0     | 2     | 7      | 1      | 4      | 5      | 6      | 2      | 6      | 5      |
| Oligosaccharide hydrolases      | PF00232.13 | Glyco_hydro_1   | 58    | 56    | 78    | 51    | 98    | 98    | 74    | 46    | 95     | 55     | 42     | 47     | 158    | 83     | 88     | 81     |
|                                 | PF00703.16 | Glyco_hydro_2   | 96    | 43    | 94    | 56    | 49    | 53    | 60    | 41    | 110    | 46     | 65     | 72     | 82     | 61     | 91     | 60     |
|                                 | PF02836.12 | Glyco_hydro_2_C | 327   | 163   | 252   | 169   | 225   | 205   | 261   | 175   | 368    | 186    | 223    | 227    | 316    | 235    | 308    | 248    |
|                                 | PF02837.13 | Glyco_hydro_2_N | 298   | 158   | 284   | 183   | 204   | 193   | 264   | 148   | 351    | 194    | 201    | 195    | 309    | 211    | 294    | 227    |
|                                 | PF00933.16 | Glyco_hydro_3   | 644   | 440   | 559   | 414   | 583   | 382   | 564   | 509   | 717    | 393    | 470    | 828    | 758    | 483    | 721    | 491    |
|                                 | PF01915.17 | Glyco_hydro_3_C | 343   | 184   | 305   | 215   | 325   | 205   | 297   | 240   | 418    | 200    | 186    | 403    | 412    | 226    | 381    | 256    |
|                                 | PF01120.12 | Alpha_L_fucos   | 86    | 39    | 74    | 41    | 58    | 40    | 65    | 49    | 68     | 36     | 50     | 35     | 78     | 66     | 71     | 67     |
|                                 | PF01301.14 | Glyco_hydro_35  | 73    | 29    | 66    | 35    | 45    | 39    | 67    | 56    | 75     | 36     | 58     | 39     | 67     | 42     | 60     | 60     |
|                                 | PF01074.17 | Glyco_hydro_38  | 9     | 6     | 12    | 9     | 8     | 12    | 9     | 6     | 17     | 5      | 8      | 8      | 8      | 8      | 15     | 14     |

| Category                                 | pfam model | name             | c1 7h | c2 7h | c3 7h | c4 7h | c1 8h | c2 8h | c3 8h | c4 8h | c1 10h | c2 10h | c3 10h | c4 10h | c1 12h | c2 12h | c3 12h | c4 12h |
|------------------------------------------|------------|------------------|-------|-------|-------|-------|-------|-------|-------|-------|--------|--------|--------|--------|--------|--------|--------|--------|
| Oligosaccharide hydrolases               | PF07748.8  | Glyco_hydro_38_C | 2     | 4     | 6     | 1     | 3     | 2     | 0     | 3     | 5      | 3      | 2      | 0      | 2      | 1      | 5      | 4      |
|                                          | PF01229.12 | Glyco_hydro_39   | 4     | 3     | 6     | 3     | 4     | 3     | 6     | 0     | 2      | 4      | 1      | 5      | 3      | 4      | 6      | 7      |
|                                          | PF02449.10 | Glyco_hydro_42   | 9     | 12    | 14    | 14    | 10    | 16    | 17    | 15    | 8      | 15     | 17     | 3      | 14     | 14     | 18     | 15     |
|                                          | PF08533.5  | Glyco_hydro_42_C | 0     | 3     | 0     | 0     | 0     | 2     | 0     | 0     | 0      | 1      | 1      | 2      | 0      | 1      | 2      | 2      |
|                                          | PF04616.9  | Glyco_hydro_43   | 749   | 265   | 486   | 410   | 658   | 342   | 444   | 278   | 845    | 273    | 363    | 487    | 674    | 331    | 516    | 407    |
|                                          | PF07470    | Glyco_hydro_88   | 236   | 70    | 228   | 108   | 183   | 109   | 175   | 116   | 280    | 95     | 128    | 143    | 213    | 100    | 170    | 132    |
|                                          | PF03632    | Glyco_hydro_65m  | 8     | 3     | 9     | 4     | 3     | 3     | 8     | 4     | 2      | 5      | 15     | 5      | 4      | 6      | 4      | 6      |
|                                          | PF02065    | Melibiose        | 158   | 98    | 138   | 105   | 211   | 131   | 135   | 105   | 193    | 96     | 95     | 125    | 146    | 136    | 116    | 111    |
| PF01204                                  | Trehalase  | 2                | 5     | 2     | 4     | 0     | 3     | 5     | 0     | 1     | 1      | 1      | 1      | 4      | 3      | 6      | 4      |        |
| Other glycoside hydrolases               | PF02056    | Glyco_hydro_4    | 6     | 5     | 2     | 9     | 13    | 10    | 4     | 4     | 6      | 5      | 10     | 5      | 9      | 5      | 10     | 6      |
|                                          | PF00722    | Glyco_hydro_16   | 129   | 50    | 58    | 52    | 121   | 85    | 66    | 57    | 93     | 57     | 55     | 78     | 187    | 75     | 101    | 91     |
|                                          | PF00728    | Glyco_hydro_20   | 88    | 29    | 42    | 33    | 46    | 22    | 42    | 34    | 56     | 22     | 46     | 46     | 49     | 28     | 56     | 52     |
|                                          | PF01055    | Glyco_hydro_31   | 465   | 172   | 347   | 241   | 428   | 248   | 339   | 251   | 615    | 186    | 268    | 341    | 503    | 196    | 317    | 284    |
|                                          | PF00251    | Glyco_hydro_32N  | 374   | 133   | 197   | 167   | 212   | 161   | 182   | 289   | 185    | 90     | 149    | 567    | 217    | 94     | 391    | 203    |
|                                          | PF02012    | BNR              | 2     | 5     | 0     | 2     | 0     | 5     | 2     | 0     | 0      | 5      | 1      | 1      | 1      | 0      | 2      | 1      |
|                                          | PF03200    | Glyco_hydro_63   | 0     | 0     | 0     | 2     | 1     | 0     | 0     | 1     | 1      | 1      | 3      | 3      | 1      | 1      | 0      | 3      |
|                                          | PF03639    | Glyco_hydro_81   | 0     | 0     | 1     | 0     | 1     | 1     | 1     | 1     | 2      | 0      | 1      | 0      | 1      | 1      | 1      | 2      |
|                                          | PF05089    | NAGLU            | 37    | 55    | 33    | 37    | 39    | 37    | 43    | 38    | 37     | 15     | 46     | 22     | 38     | 37     | 33     | 46     |
| PF03562                                  | MltA       | 0                | 1     | 0     | 0     | 0     | 0     | 0     | 1     | 1     | 2      | 1      | 2      | 0      | 0      | 2      | 3      |        |
| Lysozymes                                | PF01183    | Glyco_hydro_25   | 187   | 112   | 186   | 171   | 178   | 180   | 142   | 131   | 223    | 113    | 151    | 361    | 245    | 125    | 182    | 196    |
| Cellulose binding                        | PF00553    | CBM_2            | 2     | 0     | 2     | 1     | 1     | 1     | 3     | 1     | 1      | 3      | 3      | 2      | 4      | 2      | 1      | 1      |
|                                          | PF00942    | CBM_3            | 31    | 5     | 9     | 15    | 15    | 14    | 6     | 5     | 25     | 4      | 2      | 19     | 10     | 11     | 6      | 9      |
|                                          | PF02018    | CBM_4_9          | 76    | 100   | 71    | 78    | 64    | 112   | 80    | 51    | 91     | 118    | 60     | 99     | 89     | 120    | 104    | 93     |
|                                          | PF03425    | CBM_11           | 1     | 19    | 6     | 10    | 4     | 9     | 10    | 13    | 2      | 38     | 18     | 18     | 7      | 33     | 24     | 11     |
| Chitin binding                           | PF02839    | CBM_5_12         | 40    | 0     | 18    | 16    | 18    | 7     | 21    | 16    | 43     | 6      | 13     | 39     | 20     | 2      | 2      | 14     |
| Starch binding                           | PF00686    | CBM_20           | 96    | 20    | 58    | 41    | 66    | 67    | 81    | 40    | 174    | 74     | 64     | 60     | 142    | 55     | 42     | 65     |
|                                          | PF02903    | Alpha-amylase_N  | 3     | 5     | 1     | 8     | 19    | 8     | 9     | 8     | 18     | 14     | 7      | 3      | 10     | 6      | 4      | 5      |
|                                          | PF03423    | CBM_25           | 0     | 0     | 3     | 0     | 0     | 1     | 0     | 0     | 0      | 1      | 0      | 0      | 0      | 2      | 1      | 1      |
| Oligosaccharide binding                  | PF03422    | CBM_6            | 212   | 164   | 143   | 170   | 164   | 171   | 145   | 128   | 219    | 201    | 147    | 218    | 176    | 207    | 206    | 173    |
| Other carbohydrate binding modules (CBM) | PF00652    | Ricin_B_lectin   | 24    | 11    | 5     | 11    | 10    | 15    | 3     | 5     | 8      | 12     | 5      | 18     | 7      | 12     | 13     | 6      |
|                                          | PF00754    | F5_F8_type_C     | 35    | 24    | 37    | 20    | 27    | 12    | 19    | 11    | 37     | 21     | 12     | 19     | 30     | 30     | 17     | 30     |
|                                          | PF08305    | NPCBM            | 3     | 4     | 6     | 12    | 3     | 10    | 5     | 2     | 8      | 6      | 9      | 9      | 3      | 9      | 11     | 8      |
| Bacterial cell wall degradation (CBM)    | PF01476    | LysM             | 213   | 138   | 257   | 202   | 213   | 176   | 249   | 169   | 283    | 222    | 301    | 181    | 261    | 259    | 253    | 333    |

154 **Supplementary Table S7. Volatile fatty acid (VFA) concentrations [nmol g<sup>-1</sup> rumen fluid] of all rumen fluid samples taken between 4 am and 4 pm.** Between t0  
 155 (before the feeding) and t5 (five hours after the feeding started) a strong negative linear correlation between pH and total VFA was observed ( $r(14) = -0.84$ ,  $p =$   
 156  $< 0.0001$ ). Although pH measurements were within a narrow range (pH 6-7).

| Cow   | Time       | Formic acid | Acetic acid | Propionic acid | Iso-butyric acid | Butyric acid | Iso-valeric acid | Valeric acid | Iso-caproic acid | Caproic acid | Heptanoic acid | Sorbic acid | Benzoic acid | Lactic acid | Succinic acid | Hippuric acid | Total SCFAs |
|-------|------------|-------------|-------------|----------------|------------------|--------------|------------------|--------------|------------------|--------------|----------------|-------------|--------------|-------------|---------------|---------------|-------------|
| cow 1 | 04 am      | 0.0         | 63.4        | 16.8           | 0.8              | 16.2         | 0.5              | 1.8          | 0.0              | 0.2          | 0.0            | 0.0         | 0.0          | 0.0         | 0.0           | 0.0           | 99.7        |
|       | 07 am (t0) | 0.0         | 62.4        | 15.4           | 0.9              | 14.9         | 0.6              | 1.6          | 0.0              | 0.2          | 0.0            | 0.0         | 0.0          | 0.0         | 0.0           | 0.0           | 95.9        |
|       | 08 am (t1) | 0.0         | 61.6        | 19.6           | 0.8              | 15.2         | 0.6              | 1.5          | 0.0              | 0.2          | 0.0            | 0.0         | 0.0          | 9.1         | 0.1           | 0.0           | 108.8       |
|       | 10 am (t3) | 0.0         | 67.2        | 20.7           | 1.0              | 16.7         | 0.6              | 2.2          | 0.0              | 0.2          | 0.0            | 0.0         | 0.0          | 0.3         | 0.0           | 0.0           | 108.8       |
|       | 12 am (t5) | 0.0         | 54.3        | 13.4           | 0.8              | 11.9         | 0.4              | 1.3          | 0.0              | 0.1          | 0.0            | 0.0         | 0.0          | 0.0         | 0.0           | 0.0           | 82.1        |
|       | 02 pm      | 0.0         | 55.9        | 13.0           | 0.8              | 11.0         | 0.4              | 1.0          | 0.0              | 0.1          | 0.0            | 0.0         | 0.0          | 1.5         | 0.0           | 0.0           | 83.8        |
|       | 04 pm      | 0.0         | 59.3        | 22.6           | 0.8              | 15.9         | 0.7              | 1.7          | 0.0              | 0.2          | 0.0            | 0.0         | 0.0          | 0.9         | 0.0           | 0.0           | 102.1       |
| cow 2 | 04 am      | 0.0         | 49.7        | 23.3           | 0.8              | 7.3          | 0.4              | 3.0          | 0.0              | 0.5          | 0.1            | 0.0         | 0.0          | 0.0         | 0.0           | 0.0           | 85.1        |
|       | 07 am (t0) | 0.0         | 56.7        | 24.4           | 0.9              | 7.3          | 0.4              | 2.7          | 0.0              | 0.5          | 0.1            | 0.0         | 0.0          | 0.0         | 0.0           | 0.0           | 93.1        |
|       | 08 am (t1) | 0.0         | 55.7        | 21.6           | 0.9              | 11.4         | 0.5              | 4.2          | 0.0              | 1.0          | 0.1            | 0.0         | 0.0          | 0.9         | 0.0           | 0.0           | 96.2        |
|       | 10 am (t3) | 0.0         | 66.1        | 30.6           | 1.0              | 12.8         | 0.6              | 4.9          | 0.0              | 1.2          | 0.2            | 0.0         | 0.0          | 0.0         | 0.0           | 0.0           | 117.3       |
|       | 12 am (t5) | 0.0         | 60.1        | 27.7           | 1.0              | 9.3          | 0.5              | 3.4          | 0.0              | 0.8          | 0.1            | 0.0         | 0.0          | 0.0         | 0.0           | 0.0           | 102.8       |
|       | 02 pm      | 0.0         | 59.7        | 24.4           | 0.9              | 8.6          | 0.5              | 2.9          | 0.0              | 0.6          | 0.1            | 0.0         | 0.0          | 6.8         | 0.2           | 0.0           | 104.7       |
|       | 04 pm      | 0.3         | 54.2        | 23.0           | 0.7              | 15.3         | 0.5              | 4.9          | 0.0              | 1.4          | 0.1            | 0.0         | 0.0          | 16.2        | 0.2           | 0.0           | 116.7       |
| cow 3 | 04 am      | 0.0         | 59.9        | 24.8           | 0.7              | 10.6         | 0.4              | 2.1          | 0.0              | 0.5          | 0.1            | 0.0         | 0.0          | 0.0         | 0.0           | 0.0           | 99.0        |
|       | 07 am (t0) | 0.0         | 54.7        | 18.7           | 0.8              | 8.6          | 0.3              | 1.3          | 0.0              | 0.3          | 0.0            | 0.0         | 0.0          | 0.0         | 0.0           | 0.0           | 84.8        |
|       | 08 am (t1) | 0.0         | 59.4        | 21.8           | 0.9              | 12.0         | 0.5              | 2.0          | 0.0              | 0.6          | 0.0            | 0.0         | 0.0          | 0.0         | 0.0           | 0.0           | 97.2        |
|       | 10 am (t3) | 0.0         | 61.3        | 23.0           | 0.8              | 11.1         | 0.4              | 1.7          | 0.0              | 0.5          | 0.0            | 0.0         | 0.0          | 0.0         | 0.0           | 0.0           | 98.9        |
|       | 12 am (t5) | 0.0         | 60.3        | 21.1           | 0.9              | 10.0         | 0.5              | 1.4          | 0.0              | 0.4          | 0.0            | 0.0         | 0.0          | 0.0         | 0.0           | 0.0           | 94.6        |
|       | 02 pm      | 0.0         | 62.6        | 20.9           | 0.9              | 11.3         | 0.5              | 1.3          | 0.0              | 0.4          | 0.0            | 0.0         | 0.0          | 8.3         | 0.1           | 0.0           | 106.2       |
|       | 04 pm      | 0.0         | 65.5        | 29.1           | 1.0              | 17.6         | 0.8              | 2.4          | 0.0              | 0.8          | 0.0            | 0.0         | 0.0          | 1.7         | 0.0           | 0.0           | 118.9       |
| cow 4 | 04 am      | 0.0         | 70.2        | 32.3           | 0.8              | 12.4         | 0.5              | 3.2          | 0.0              | 0.4          | 0.0            | 0.0         | 0.0          | 0.0         | 0.0           | 0.0           | 119.9       |
|       | 07 am (t0) | 0.0         | 56.1        | 21.4           | 0.7              | 8.0          | 0.3              | 1.7          | 0.0              | 0.2          | 0.0            | 0.0         | 0.0          | 0.0         | 0.0           | 0.0           | 88.4        |
|       | 08 am (t1) | 0.0         | 54.2        | 18.9           | 0.8              | 8.1          | 0.3              | 1.5          | 0.0              | 0.2          | 0.0            | 0.0         | 0.0          | 0.0         | 0.1           | 0.0           | 84.0        |
|       | 10 am (t3) | 0.0         | 60.8        | 20.0           | 0.9              | 7.8          | 0.4              | 1.3          | 0.0              | 0.2          | 0.0            | 0.0         | 0.0          | 0.0         | 0.0           | 0.0           | 91.4        |
|       | 12 am (t5) | 0.0         | 53.0        | 15.8           | 0.9              | 6.1          | 0.4              | 0.8          | 0.0              | 0.1          | 0.0            | 0.0         | 0.0          | 0.0         | 0.0           | 0.0           | 77.0        |
|       | 02 pm      | 0.0         | 53.5        | 15.5           | 0.9              | 8.7          | 0.4              | 1.2          | 0.0              | 0.2          | 0.0            | 0.0         | 0.0          | 4.9         | 0.0           | 0.0           | 85.2        |
|       | 04 pm      | 0.0         | 64.5        | 24.8           | 0.9              | 21.6         | 0.7              | 3.5          | 0.0              | 0.6          | 0.0            | 0.0         | 0.0          | 10.7        | 0.0           | 0.0           | 127.3       |

158 **Supplementary Table S8. Additional information on the cows.**

| Cow ID | Parity | Days in milk | Live weight (kg) | Milk yield (kg) | Days in pregnancy |
|--------|--------|--------------|------------------|-----------------|-------------------|
| Cow 1  | 3      | 242          | 629              | 25.4            | 97                |
| Cow 2  | 4      | 164          | 597              | 36.5            | 24                |
| Cow 3  | 3      | 95           | 600              | 34.6            | -                 |
| Cow 4  | 2      | 357          | 581              | 37.4            | 174               |

159

160 **Supplementary references**

- 161 1. Hansen B. Determination of nitrogen as elementary N, an alternative to Kjeldahl. Acta Agr Scand.  
162 1989;39:113-118.
- 163 2. Stoldt W. Vorschlag zur Vereinheitlichung der Fettbestimmung in Lebensmitteln. Fette Seifen  
164 1952;54:206-207.
- 165 3. Mertens DR. Gravimetric determination of amylase-treated neutral detergent fiber in feeds with  
166 refluxing in beakers or crucibles: Collaborative study. J AOAC Int. 2002;85:1217-1240.
